# Supplementary material for: An electron induced two-dimensional switch made of azobenzene derivatives anchored in supramolecular assemblies
Source: Royal Society of Chemistry journal article supplement (doi:10.1039/b924488c), 2010-01-01
Supplement: b924488c.pdf [file b924488c.pdf]

**An electron induced switching process within  
supramolecular-assemblies of an azobenzene derivate on Au(111)  
- Supporting Information -**

Jörg Henzl and Karina Morgenstern

*Leibniz Universität Hannover, Institut für Festkörperphysik,  
Abteilung für atomare und molekulare Strukturen (ATMOS),  
Appelstr. 2, D-30167 Hannover, Germany*

# A. $dI/dV$ -spectra of *cis*\*-isomer

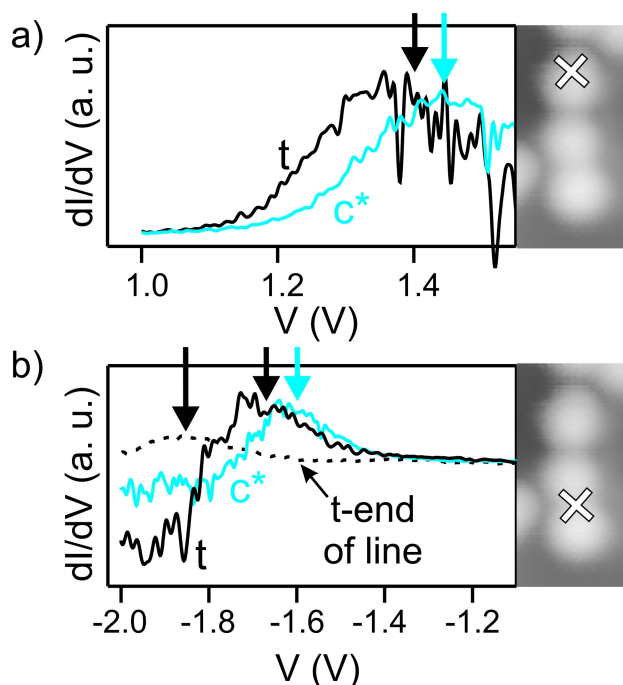

FIG. 1.  $dI/dV$  spectra. Black: Molecule in *trans*-configuration (marked with t). Cyan: Molecule in *cis*\*-configuration (marked with c\*). Both molecules are within a meandering line. Arrows mark positions of molecular peaks as determined by Gaussian fits. Insets: STM image of molecule ( $I=310$  pA,  $V=125$  mV,  $(2.6 \times 1.3)$  nm<sup>2</sup>). Cross indicates position of tip during spectra acquisition. a) Lock-In parameters:  $\nu=626$  Hz,  $V_{mod}=10$  mV. b) Dashed black line: Molecule in *trans*-configuration at the end of a meandering line. Lock-In parameters:  $\nu=956$  Hz,  $V_{mod}=10$  mV.

Figure 1 shows  $dI/dV$ -data in the positive (negative) bias regime taken on both configurations bonded within a meandering line. The spectra are measured on the single (double) protrusion C (A and B) (see Figure 2 in article) where the LUMO (HOMO) has its major weight (see Figure 3 of article). The tip position during the data acquisition is indicated by a cross in the insets of Figure 1.a and b and is the same for both configurations. For the *trans*-configuration the LUMO lies at  $(1.40 \pm 0.02)$  V (see article), while for the *cis*\*-configuration this state is slightly shifted to 1.44 V (see Figure 1.a). A slightly larger shift is also observed for the HOMO (see Figure 1.b). The HOMO of the *trans*-isomer is located at -1.67 V, while this orbital is found at -1.60 V for the *cis*\*-isomer.

The shift for both orbitals is with 0.07 V (HOMO) and 0.04 V (LUMO) quite small

reflecting the small changes in the geometric structure of the surface-modified isomers. For comparison, the LUMO of TBA on Au(111) shifts by 0.3 V as deduced by two-photon photoemission.[Hagen *et. al.*, J. Chem. Phys. **129**, 164102 (2008)] There the geometry is more altered than in our case because the *cis*-configuration is three-dimensional. This change in dimensionality leads to a smaller contact area with the surface. Both affect the energetic position of the orbital. The importance of bonding is exemplified for the LUMO of the *trans*-configuration at the end of a meandering line (Figure 1.b). There the orbital is shifted to -1.85 V, *i.e.* by -0.18 V.

## **B. Movie of electron induced manipulation**

The movie consists of a serie of manipulation as described in the article. Between each image of the movie both star structures are manipulated on different molecules.
